# Supplementary material for: Metabolomics Approach Reveals Integrated Metabolic Network Associated with Serotonin Deficiency
Source: PubMed Central journal article supplement (PMC4495385; doi:10.1038/srep11864), 2015-07-08
Supplement: srep11864-s1.pdf [file srep11864-s1.pdf]

# Metabolomics Approach Reveals Integrated Metabolic Network Associated with Serotonin Deficiency

Rui Weng<sup>1</sup>, Sensen Shen<sup>1</sup>, Yonglu Tian<sup>2</sup>, Casey Burton<sup>3</sup>, Xinyuan Xu<sup>1</sup>, Yi Liu<sup>1</sup>, Cuilan Chang<sup>1</sup>, Yu Bai<sup>1</sup>\*, Huwei Liu<sup>1</sup>

1 Beijing National Laboratory for Molecular Sciences, Key Laboratory of Bioorganic Chemistry and Molecular Engineering of Ministry of Education, Institute of Analytical Chemistry, College of Chemistry and Molecular Engineering, Peking University, Beijing 100871, China

2 Laboratory Animal Center, Peking University, Beijing 100871, China

3 Department of Chemistry and Center for Biomedical Science & Engineering, Missouri University of Science and Technology, Rolla, MO 65409, USA

Corresponding Author

\* E-mail: yu.bai@pku.edu.cn. Phone: +86-10-62758198. Fax: +86-10-62751708.

**Supplementary Table S1** Unidentified candidate biomarkers of pCPA-induced serotonin deficiency

|      | Retention time/min | <i>m/z</i> | Fold change <sup>a</sup> | <i>p</i> value <sup>b</sup> | VIP <sup>c</sup> |
|------|--------------------|------------|--------------------------|-----------------------------|------------------|
| ESI+ | 7.3625             | 324.0547   | 6.62                     | 5.47×10 <sup>-3</sup>       | 5.73             |
|      | 9.0816             | 352.0510   | 4.49                     | 5.86×10 <sup>-3</sup>       | 5.08             |
|      | 5.6483             | 224.0465   | 4.20                     | 3.75×10 <sup>-2</sup>       | 1.94             |
|      | 9.0819             | 356.0468   | 3.28                     | 9.57×10 <sup>-4</sup>       | 1.71             |
|      | 10.0987            | 338.9932   | 3.16                     | 9.26×10 <sup>-3</sup>       | 2.19             |
|      | 10.1176            | 431.0020   | 2.83                     | 5.72×10 <sup>-4</sup>       | 1.53             |
|      | 8.5833             | 406.0418   | 2.78                     | 2.94×10 <sup>-2</sup>       | 1.23             |
|      | 9.6320             | 459.3483   | 2.63                     | 1.86×10 <sup>-2</sup>       | 1.14             |
|      | 10.0377            | 375.2895   | 2.39                     | 3.75×10 <sup>-3</sup>       | 1.28             |
|      | 11.6329            | 939.6556   | 2.08                     | 7.65×10 <sup>-4</sup>       | 2.22             |
|      | 7.6590             | 585.2686   | 2.07                     | 8.95×10 <sup>-5</sup>       | 1.26             |
|      | 7.0540             | 538.2817   | 1.99                     | 3.65×10 <sup>-3</sup>       | 1.83             |
|      | 9.9271             | 441.3393   | 1.96                     | 2.86×10 <sup>-2</sup>       | 1.18             |
|      | 8.9168             | 475.3417   | 1.90                     | 1.95×10 <sup>-2</sup>       | 1.01             |
|      | 10.0376            | 357.2816   | 1.89                     | 3.65×10 <sup>-3</sup>       | 2.31             |
|      | 7.0588             | 533.3270   | 1.83                     | 3.84×10 <sup>-4</sup>       | 1.36             |
|      | 7.0531             | 516.3003   | 1.78                     | 8.41×10 <sup>-4</sup>       | 1.41             |
|      | 1.1520             | 322.1076   | 1.73                     | 2.84×10 <sup>-3</sup>       | 2.54             |
|      | 7.0530             | 498.2889   | 1.73                     | 4.85×10 <sup>-4</sup>       | 1.28             |
|      | 9.4896             | 211.1338   | 1.62                     | 3.85×10 <sup>-3</sup>       | 1.06             |
|      | 7.0816             | 241.1774   | 1.61                     | 3.05×10 <sup>-2</sup>       | 1.18             |
|      | 6.9517             | 225.1104   | 1.60                     | 3.94×10 <sup>-2</sup>       | 1.11             |
|      | 7.3735             | 172.0764   | 1.59                     | 5.97×10 <sup>-3</sup>       | 1.23             |
|      | 12.072             | 90.9787    | 1.58                     | 6.55×10 <sup>-4</sup>       | 1.97             |
|      | 0.9073             | 271.9588   | 1.57                     | 4.65×10 <sup>-4</sup>       | 1.17             |
|      | 0.9628             | 657.1317   | 1.52                     | 2.91×10 <sup>-2</sup>       | 1.42             |
|      | 10.6347            | 239.1537   | 1.51                     | 5.80×10 <sup>-3</sup>       | 2.01             |
|      | 0.9471             | 342.0714   | 1.50                     | 3.72×10 <sup>-3</sup>       | 1.04             |
|      | 0.7741             | 155.0788   | -1.51                    | 5.98×10 <sup>-3</sup>       | 1.54             |
|      | 5.0014             | 160.0749   | -1.53                    | 3.85×10 <sup>-3</sup>       | 6.55             |
|      | 0.7742             | 449.0111   | -1.54                    | 2.04×10 <sup>-4</sup>       | 1.03             |
|      | 9.9008             | 303.6434   | -1.56                    | 7.84×10 <sup>-4</sup>       | 1.13             |
|      | 0.7966             | 782.7713   | -1.59                    | 8.90×10 <sup>-3</sup>       | 1.00             |
|      | 5.0018             | 177.1021   | -1.60                    | 1.83×10 <sup>-2</sup>       | 4.04             |
|      | 5.0165             | 221.0939   | -1.62                    | 3.80×10 <sup>-3</sup>       | 1.28             |
|      | 1.1531             | 268.1084   | -1.65                    | 5.76×10 <sup>-5</sup>       | 1.81             |
|      | 8.5907             | 614.1832   | -1.69                    | 3.95×10 <sup>-3</sup>       | 2.27             |
|      | 11.287             | 558.3536   | -1.70                    | 7.89×10 <sup>-4</sup>       | 1.57             |
|      | 0.7748             | 516.9981   | -1.71                    | 2.37×10 <sup>-3</sup>       | 1.35             |
|      | 10.4732            | 862.5690   | -1.74                    | 5.74×10 <sup>-4</sup>       | 1.41             |
|      | 16.8164            | 369.3521   | -1.75                    | 6.76×10 <sup>-4</sup>       | 3.70             |
|      | 17.303             | 180.1251   | -1.78                    | 4.84×10 <sup>-3</sup>       | 4.05             |
|      | 0.9649             | 291.0721   | -1.92                    | 8.74×10 <sup>-5</sup>       | 3.01             |

|      |         |          |       |                       |      |
|------|---------|----------|-------|-----------------------|------|
|      | 10.1501 | 665.2730 | -4.46 | $4.82 \times 10^{-3}$ | 1.22 |
| ESI- | 10.0707 | 788.3504 | 6.06  | $7.49 \times 10^{-4}$ | 9.50 |
|      | 5.6430  | 283.0094 | 5.48  | $2.78 \times 10^{-4}$ | 5.98 |
|      | 7.0071  | 264.9855 | 5.46  | $3.25 \times 10^{-3}$ | 3.91 |
|      | 9.0505  | 350.0340 | 5.21  | $4.73 \times 10^{-3}$ | 4.99 |
|      | 10.0566 | 428.9893 | 5.19  | $4.78 \times 10^{-3}$ | 5.21 |
|      | 7.0114  | 125.0152 | 5.02  | $6.86 \times 10^{-5}$ | 3.50 |
|      | 10.0622 | 587.0374 | 5.02  | $6.89 \times 10^{-4}$ | 6.38 |
|      | 7.995   | 400.0178 | 4.88  | $5.94 \times 10^{-4}$ | 2.66 |
|      | 10.0642 | 496.9777 | 4.50  | $3.99 \times 10^{-2}$ | 2.41 |
|      | 10.0622 | 297.0096 | 4.16  | $9.67 \times 10^{-4}$ | 2.27 |
|      | 9.0560  | 418.0203 | 4.12  | $5.86 \times 10^{-3}$ | 2.44 |
|      | 10.0698 | 856.3374 | 4.08  | $4.79 \times 10^{-3}$ | 2.40 |
|      | 10.0701 | 856.3451 | 4.03  | $3.86 \times 10^{-4}$ | 3.04 |
|      | 7.1100  | 334.9940 | 3.87  | $7.86 \times 10^{-3}$ | 2.75 |
|      | 10.0636 | 377.9914 | 3.70  | $7.98 \times 10^{-4}$ | 1.99 |
|      | 7.1110  | 402.9771 | 3.68  | $5.74 \times 10^{-4}$ | 2.12 |
|      | 9.0610  | 358.9900 | 3.53  | $7.89 \times 10^{-3}$ | 1.67 |
|      | 10.0757 | 496.9691 | 3.40  | $3.86 \times 10^{-3}$ | 3.42 |
|      | 10.0755 | 924.3298 | 3.27  | $9.85 \times 10^{-4}$ | 1.68 |
|      | 10.0619 | 583.2061 | 3.21  | $7.22 \times 10^{-3}$ | 1.56 |
|      | 10.0604 | 583.2180 | 3.19  | $5.74 \times 10^{-3}$ | 1.84 |
|      | 10.0684 | 390.9090 | 3.06  | $7.05 \times 10^{-3}$ | 2.26 |
|      | 10.0813 | 856.3289 | 2.79  | $3.48 \times 10^{-2}$ | 1.26 |
|      | 6.0866  | 349.1473 | 2.61  | $5.47 \times 10^{-4}$ | 1.55 |
|      | 9.9851  | 459.2677 | 2.50  | $7.98 \times 10^{-3}$ | 2.29 |
|      | 10.6368 | 455.3094 | 2.46  | $3.92 \times 10^{-3}$ | 1.56 |
|      | 10.6303 | 455.3200 | 2.36  | $6.17 \times 10^{-4}$ | 1.30 |
|      | 7.6856  | 453.2853 | 2.12  | $2.96 \times 10^{-2}$ | 1.80 |
|      | 8.4908  | 453.2830 | 2.10  | $4.75 \times 10^{-3}$ | 2.70 |
|      | 8.4937  | 407.2789 | 2.06  | $4.50 \times 10^{-3}$ | 2.36 |
|      | 7.6859  | 407.2804 | 2.04  | $4.71 \times 10^{-3}$ | 2.97 |
|      | 9.9829  | 437.2888 | 1.98  | $6.08 \times 10^{-3}$ | 1.17 |
|      | 8.4924  | 475.2676 | 1.93  | $6.98 \times 10^{-4}$ | 1.38 |
|      | 0.9604  | 335.0472 | 1.76  | $4.94 \times 10^{-4}$ | 1.88 |
|      | 9.9820  | 391.2854 | 1.74  | $7.09 \times 10^{-3}$ | 2.00 |
|      | 8.4933  | 473.2534 | 1.71  | $3.31 \times 10^{-3}$ | 2.07 |
|      | 0.8116  | 834.8262 | 1.69  | $3.75 \times 10^{-2}$ | 1.07 |
|      | 10.3096 | 133.6157 | 1.67  | $8.90 \times 10^{-5}$ | 1.29 |
|      | 5.6416  | 245.0108 | 1.63  | $5.89 \times 10^{-4}$ | 1.41 |
|      | 7.9947  | 475.2656 | 1.63  | $3.65 \times 10^{-2}$ | 1.35 |
|      | 10.1929 | 295.2268 | 1.59  | $7.96 \times 10^{-5}$ | 1.25 |
|      | 13.5919 | 61.9890  | 1.56  | $3.27 \times 10^{-3}$ | 1.25 |
|      | 10.8274 | 297.2414 | 1.56  | $7.48 \times 10^{-5}$ | 1.66 |
|      | 6.9512  | 201.1113 | 1.55  | $6.89 \times 10^{-4}$ | 4.05 |

|         |          |       |                       |      |
|---------|----------|-------|-----------------------|------|
| 6.8509  | 199.1045 | 1.54  | $2.16 \times 10^{-2}$ | 2.72 |
| 6.8406  | 199.0946 | 1.54  | $4.58 \times 10^{-3}$ | 1.14 |
| 10.2796 | 241.1803 | 1.53  | $6.78 \times 10^{-4}$ | 1.75 |
| 5.7626  | 245.0101 | 1.51  | $3.05 \times 10^{-3}$ | 1.28 |
| 9.8435  | 977.5776 | -1.50 | $4.78 \times 10^{-3}$ | 1.80 |
| 10.3929 | 526.2981 | -1.51 | $2.83 \times 10^{-3}$ | 1.10 |
| 6.8484  | 154.4972 | -1.51 | $654 \times 10^{-4}$  | 1.16 |
| 1.0128  | 264.9576 | -1.51 | $4.84 \times 10^{-3}$ | 4.47 |
| 9.1126  | 582.2164 | -1.53 | $2.19 \times 10^{-4}$ | 1.27 |
| 9.5202  | 623.2914 | -1.53 | $5.83 \times 10^{-3}$ | 1.10 |
| 9.0752  | 589.1886 | -1.57 | $9.47 \times 10^{-5}$ | 1.41 |
| 5.6032  | 809.2496 | -1.66 | $3.29 \times 10^{-3}$ | 1.34 |
| 0.9622  | 259.0200 | -1.73 | $5.49 \times 10^{-4}$ | 4.28 |
| 5.9692  | 306.9978 | -1.77 | $6.54 \times 10^{-3}$ | 1.27 |
| 11.519  | 616.2779 | -1.94 | $7.69 \times 10^{-3}$ | 1.25 |
| 1.1629  | 391.1207 | -2.05 | $4.28 \times 10^{-3}$ | 2.46 |

a) Fold change was calculated from the arithmetic mean values of the pCPA group and the control group. Fold change with a positive value indicates a relatively higher concentration in the pCPA-injected mice, while a negative value indicates a relatively lower concentration compared with the control mice.

b) *P*-values were determined by the Mann-Whitney *U* test.

c) VIP denotes variable importance for projection where values larger than 1.00 reflects high contribution to the distinction between the pCPA group and the control group.

**Supplementary Table S2** Summary of the pCPA-induced Metabolic Pathway Analysis (MetPA) results

| No. | Pathway Name                                        | Hits <sup>a</sup> | <i>p</i> <sup>b</sup> | -log( <i>p</i> ) | Impact <sup>c</sup> |
|-----|-----------------------------------------------------|-------------------|-----------------------|------------------|---------------------|
| 1   | Phenylalanine, tyrosine and tryptophan biosynthesis | 2                 | 7.0824E-4             | 7.2527           | 1.0                 |
| 2   | Phenylalanine metabolism                            | 2                 | 0.0061988             | 5.0834           | 0.40741             |
| 3   | Tryptophan metabolism                               | 3                 | 0.009048              | 4.7052           | 0.19371             |
| 4   | Citrate cycle (TCA cycle)                           | 3                 | 0.0011993             | 6.726            | 0.14721             |
| 5   | Purine metabolism                                   | 4                 | 0.0057049             | 5.1664           | 0.06726             |
| 6   | Alanine, aspartate and glutamate metabolism         | 2                 | 0.028554              | 3.556            | 0.06329             |
| 7   | Butanoate metabolism                                | 2                 | 0.024215              | 3.7208           | 0.0                 |
| 8   | Ubiquinone and other terpenoid-quinone biosynthesis | 1                 | 0.033517              | 3.3957           | 0.0                 |
| 9   | D-Glutamine and D-glutamate metabolism              | 1                 | 0.055273              | 2.8955           | 0.0                 |
| 10  | Glyoxylate and dicarboxylate metabolism             | 1                 | 0.18588               | 1.6827           | 0.25806             |
| 11  | Tyrosine metabolism                                 | 1                 | 0.39796               | 0.9214           | 0.14045             |
| 12  | Aminoacyl-tRNA biosynthesis                         | 2                 | 0.18107               | 1.7089           | 0.0                 |
| 13  | Propanoate metabolism                               | 1                 | 0.2044                | 1.5877           | 0.0                 |

a) The 'Hits' is the number of matched compound from the uploaded data in the pathway.

b) The '*p*' is the original *p* value calculated from the pathway enrichment analysis.

c) The 'Impact' is the pathway impact value calculated from the pathway topological analysis.

**Supplementary Table S3** Perturbed metabolic pathways and associated metabolites of pCPA-induced serotonin deficiency

| Pathway category          | Pathway <sup>a</sup>                                | Associated metabolites <sup>b</sup>                                                      |
|---------------------------|-----------------------------------------------------|------------------------------------------------------------------------------------------|
| Amino acid metabolism     | Phenylalanine, tyrosine and tryptophan biosynthesis | Phenylalanine ↑, Tyrosine ↓                                                              |
|                           | Phenylalanine metabolism                            | Phenylalanine ↑, Hippurate ↑, Tyrosine ↓                                                 |
|                           | Tryptophan metabolism                               | Serotonin ↓, 5-Hydroxyindoleacetate ↓, Kynurenine ↑, Kynurenate ↑, 3-Hydroxykynurenine ↑ |
| Energy metabolism         | Citrate cycle                                       | Citrate ↓, Oxoglutarate ↓, Succinate ↓                                                   |
|                           | -                                                   | Creatinine ↓                                                                             |
| Nucleotide metabolism     | Purine metabolism                                   | Xanthine ↓, Uric acid ↓, Guanosine ↑, Hypoxanthine ↑                                     |
| Lipid metabolism          | -                                                   | LysoPC (18:4) ↑, LysoPC (20:4) ↑, LysoPC (22:6) ↑                                        |
| Gut microflora metabolism | -                                                   | Hippurate ↑, 3-Indolepropionic acid ↓, Indoxyl sulfate ↓                                 |

Notes: a) the column 'Pathway' refers to the KEGG database-based pathway correlation results by MetPA. b) '↑' indicates increased metabolite level of the pCPA-injected mice, while '↓' indicates decreased metabolite level compared with the control mice.

**Supplementary Table S4** Unidentified candidate biomarkers in Tph2<sup>-/-</sup> mice

|      | Retention time | m/z      | Fold change <sup>a</sup> | p value <sup>b</sup>  | VIP <sup>c</sup> |
|------|----------------|----------|--------------------------|-----------------------|------------------|
| ESI+ | 9.6022         | 987.6415 | 6.23                     | 2.59×10 <sup>-2</sup> | 2.59             |
|      | 6.6862         | 496.2730 | 6.01                     | 3.75×10 <sup>-2</sup> | 1.61             |
|      | 13.5353        | 826.5392 | 5.65                     | 7.25×10 <sup>-3</sup> | 2.91             |
|      | 13.6442        | 443.2080 | 4.69                     | 7.38×10 <sup>-3</sup> | 1.94             |
|      | 9.5713         | 987.6500 | 4.35                     | 4.86×10 <sup>-4</sup> | 3.04             |
|      | 9.5257         | 452.2688 | 3.61                     | 4.76×10 <sup>-4</sup> | 3.62             |
|      | 12.7179        | 804.5511 | 3.13                     | 2.41×10 <sup>-3</sup> | 6.24             |
|      | 13.6508        | 828.5532 | 2.95                     | 9.43×10 <sup>-5</sup> | 13.52            |
|      | 0.7324         | 118.9430 | 2.83                     | 4.72×10 <sup>-4</sup> | 1.12             |
|      | 5.6126         | 515.2682 | 2.83                     | 5.25×10 <sup>-3</sup> | 1.30             |
|      | 12.9662        | 732.5593 | 2.68                     | 4.21×10 <sup>-3</sup> | 2.16             |
|      | 12.7481        | 354.1834 | 2.61                     | 4.86×10 <sup>-3</sup> | 1.05             |
|      | 5.5941         | 515.2622 | 2.55                     | 9.32×10 <sup>-3</sup> | 1.30             |
|      | 12.7402        | 354.1736 | 2.50                     | 9.36×10 <sup>-4</sup> | 1.35             |
|      | 9.5243         | 434.2700 | 2.43                     | 2.87×10 <sup>-2</sup> | 1.05             |
|      | 12.7344        | 352.1792 | 2.33                     | 4.94×10 <sup>-3</sup> | 2.04             |
|      | 5.3954         | 599.5998 | 2.23                     | 3.57×10 <sup>-4</sup> | 1.56             |
|      | 5.3969         | 599.9449 | 2.21                     | 9.35×10 <sup>-5</sup> | 1.58             |
|      | 9.6080         | 516.3069 | 2.17                     | 6.19×10 <sup>-3</sup> | 9.87             |
|      | 10.6554        | 959.6463 | 2.15                     | 7.35×10 <sup>-3</sup> | 1.44             |
|      | 13.6485        | 778.5327 | 2.10                     | 5.32×10 <sup>-3</sup> | 3.91             |
|      | 12.7347        | 311.1565 | 2.09                     | 1.44×10 <sup>-2</sup> | 1.10             |
|      | 1.1689         | 153.0414 | 2.08                     | 9.43×10 <sup>-3</sup> | 4.13             |
|      | 12.5516        | 367.1907 | 2.03                     | 3.85×10 <sup>-3</sup> | 1.29             |
|      | 9.5189         | 452.2773 | 2.03                     | 4.64×10 <sup>-3</sup> | 3.38             |
|      | 9.3913         | 516.3074 | 1.99                     | 3.65×10 <sup>-4</sup> | 4.62             |
|      | 13.6458        | 804.5510 | 1.99                     | 9.59×10 <sup>-3</sup> | 6.64             |
|      | 12.0921        | 723.5406 | 1.96                     | 8.37×10 <sup>-3</sup> | 2.97             |
|      | 17.0952        | 328.2720 | 1.95                     | 9.23×10 <sup>-5</sup> | 1.42             |
|      | 9.3944         | 494.3234 | 1.91                     | 5.93×10 <sup>-3</sup> | 6.96             |
|      | 12.2271        | 90.5080  | 1.91                     | 7.68×10 <sup>-4</sup> | 1.64             |
|      | 10.8388        | 510.3548 | 1.84                     | 4.85×10 <sup>-4</sup> | 7.75             |
|      | 13.6395        | 350.2677 | 1.82                     | 5.03×10 <sup>-4</sup> | 1.84             |
|      | 9.5168         | 588.3065 | 1.81                     | 8.29×10 <sup>-3</sup> | 1.31             |
|      | 8.1758         | 342.2663 | 1.81                     | 4.49×10 <sup>-3</sup> | 1.16             |
|      | 9.5187         | 474.2621 | 1.81                     | 5.83×10 <sup>-3</sup> | 1.52             |
|      | 12.2322        | 725.5593 | 1.80                     | 8.77×10 <sup>-5</sup> | 2.56             |
|      | 9.5975         | 494.3226 | 1.79                     | 4.95×10 <sup>-4</sup> | 24.10            |
|      | 13.835         | 102.0904 | 1.76                     | 9.43×10 <sup>-3</sup> | 3.63             |
|      | 13.6585        | 834.6083 | 1.75                     | 5.39×10 <sup>-3</sup> | 1.87             |
|      | 13.535         | 804.5508 | 1.75                     | 8.87×10 <sup>-4</sup> | 8.13             |
|      | 9.5824         | 652.2878 | 1.72                     | 3.87×10 <sup>-3</sup> | 1.23             |
|      | 13.6500        | 808.5830 | 1.71                     | 3.95×10 <sup>-3</sup> | 2.43             |

---

|         |          |       |                       |       |
|---------|----------|-------|-----------------------|-------|
| 9.8100  | 568.3407 | 1.71  | $3.85 \times 10^{-3}$ | 8.89  |
| 10.3142 | 568.3445 | 1.70  | $6.69 \times 10^{-3}$ | 2.26  |
| 16.4063 | 772.6218 | 1.70  | $5.72 \times 10^{-3}$ | 1.05  |
| 13.6569 | 848.5493 | 1.68  | $8.50 \times 10^{-4}$ | 2.26  |
| 9.9556  | 502.3021 | 1.67  | $4.65 \times 10^{-3}$ | 11.07 |
| 12.9361 | 778.5330 | 1.66  | $3.96 \times 10^{-3}$ | 3.20  |
| 13.6510 | 756.5569 | 1.65  | $3.28 \times 10^{-2}$ | 1.46  |
| 9.3827  | 564.2994 | 1.64  | $6.59 \times 10^{-4}$ | 1.56  |
| 10.3365 | 546.3559 | 1.63  | $9.95 \times 10^{-5}$ | 10.20 |
| 12.9455 | 828.5516 | 1.63  | $3.75 \times 10^{-4}$ | 9.25  |
| 9.5845  | 532.2808 | 1.59  | $3.72 \times 10^{-4}$ | 1.90  |
| 13.5318 | 778.5340 | 1.58  | $5.48 \times 10^{-3}$ | 3.79  |
| 9.5730  | 104.1072 | 1.57  | $4.83 \times 10^{-3}$ | 3.95  |
| 13.5286 | 90.9778  | 1.57  | $3.98 \times 10^{-3}$ | 1.24  |
| 12.2767 | 538.3900 | 1.56  | $8.63 \times 10^{-3}$ | 2.49  |
| 9.5829  | 601.2890 | 1.56  | $4.83 \times 10^{-4}$ | 1.68  |
| 9.4252  | 580.2830 | 1.54  | $9.45 \times 10^{-5}$ | 1.12  |
| 12.5074 | 326.3070 | 1.52  | $3.84 \times 10^{-4}$ | 1.17  |
| 12.4934 | 512.4890 | -1.50 | $2.98 \times 10^{-4}$ | 1.56  |
| 5.9508  | 225.1103 | -1.50 | $6.77 \times 10^{-3}$ | 1.26  |
| 1.0088  | 61.0115  | -1.50 | $5.74 \times 10^{-3}$ | 1.42  |
| 13.7856 | 432.2775 | -1.52 | $4.86 \times 10^{-3}$ | 1.04  |
| 1.0120  | 102.0548 | -1.54 | $3.85 \times 10^{-3}$ | 2.61  |
| 1.1737  | 165.0533 | -1.56 | $9.89 \times 10^{-3}$ | 9.52  |
| 0.9268  | 132.0760 | -1.56 | $2.73 \times 10^{-2}$ | 11.48 |
| 1.2063  | 218.1387 | -1.57 | $2.85 \times 10^{-3}$ | 3.98  |
| 5.3918  | 244.1218 | -1.59 | $9.82 \times 10^{-4}$ | 1.04  |
| 7.0680  | 281.1745 | -1.64 | $9.52 \times 10^{-3}$ | 1.46  |
| 11.8643 | 282.2792 | -1.64 | $2.75 \times 10^{-4}$ | 1.64  |
| 11.4396 | 456.4085 | -1.67 | $3.29 \times 10^{-4}$ | 1.54  |
| 12.3221 | 139.9894 | -1.68 | $7.73 \times 10^{-3}$ | 2.66  |
| 7.0866  | 223.1677 | -1.71 | $3.95 \times 10^{-3}$ | 1.15  |
| 5.7468  | 334.1408 | -1.72 | $8.49 \times 10^{-5}$ | 1.64  |
| 5.5464  | 144.0672 | -1.73 | $3.62 \times 10^{-4}$ | 1.28  |
| 7.9428  | 300.1990 | -1.74 | $4.86 \times 10^{-4}$ | 1.51  |
| 4.9974  | 297.1444 | -1.81 | $8.57 \times 10^{-4}$ | 1.23  |
| 5.6020  | 132.0451 | -1.82 | $5.72 \times 10^{-3}$ | 1.43  |
| 15.5793 | 342.3357 | -1.83 | $9.06 \times 10^{-3}$ | 1.23  |
| 5.5404  | 218.9702 | -1.84 | $8.40 \times 10^{-3}$ | 1.99  |
| 5.1730  | 173.0811 | -1.86 | $3.75 \times 10^{-3}$ | 1.67  |
| 0.9246  | 304.1603 | -1.89 | $8.76 \times 10^{-4}$ | 1.17  |
| 12.3479 | 758.5732 | -1.91 | $5.87 \times 10^{-3}$ | 3.44  |
| 4.9907  | 297.1511 | -1.92 | $3.95 \times 10^{-4}$ | 1.11  |
| 4.9939  | 182.0796 | -1.93 | $6.59 \times 10^{-4}$ | 1.82  |
| 5.9410  | 176.0379 | -1.95 | $5.83 \times 10^{-3}$ | 1.71  |

---



|         |          |          |                       |                       |       |
|---------|----------|----------|-----------------------|-----------------------|-------|
| 5.5946  | 723.8156 | -2.10    | $5.85 \times 10^{-3}$ | 1.02                  |       |
| 5.9448  | 268.0065 | -2.12    | $2.83 \times 10^{-2}$ | 1.40                  |       |
| 5.9430  | 246.0242 | -2.13    | $3.97 \times 10^{-3}$ | 1.82                  |       |
| 12.1164 | 828.5534 | -2.16    | $9.37 \times 10^{-3}$ | 4.26                  |       |
| 8.2415  | 538.3544 | -2.17    | $9.82 \times 10^{-3}$ | 1.10                  |       |
| 4.9965  | 311.1243 | -2.18    | $7.93 \times 10^{-4}$ | 2.39                  |       |
| 7.7841  | 253.1448 | -2.18    | $5.73 \times 10^{-3}$ | 1.43                  |       |
| 5.9416  | 976.9729 | -2.21    | $3.06 \times 10^{-3}$ | 1.02                  |       |
| 5.9447  | 134.0272 | -2.22    | $2.85 \times 10^{-2}$ | 2.92                  |       |
| 4.9987  | 355.1020 | -2.27    | $8.40 \times 10^{-4}$ | 1.06                  |       |
| 12.3282 | 143.9664 | -2.27    | $3.02 \times 10^{-3}$ | 2.00                  |       |
| 8.4250  | 395.2067 | -2.28    | $4.86 \times 10^{-3}$ | 1.37                  |       |
| 1.0776  | 226.0458 | -2.44    | $2.95 \times 10^{-3}$ | 3.62                  |       |
| 12.3292 | 786.6076 | -2.50    | $8.16 \times 10^{-5}$ | 1.23                  |       |
| 7.8594  | 512.3348 | -2.56    | $9.57 \times 10^{-5}$ | 5.91                  |       |
| 5.2680  | 206.0467 | -2.57    | $3.84 \times 10^{-4}$ | 1.03                  |       |
| 7.7835  | 213.1513 | -2.58    | $7.38 \times 10^{-3}$ | 1.31                  |       |
| 5.5223  | 390.1849 | -2.62    | $5.62 \times 10^{-3}$ | 1.02                  |       |
| 1.1814  | 275.1120 | -2.63    | $3.86 \times 10^{-3}$ | 1.05                  |       |
| 11.9498 | 484.4418 | -2.71    | $8.26 \times 10^{-3}$ | 1.45                  |       |
| 7.8508  | 534.3170 | -2.72    | $4.86 \times 10^{-4}$ | 3.06                  |       |
| 9.1148  | 431.2035 | -2.74    | $2.94 \times 10^{-3}$ | 1.53                  |       |
| 0.9382  | 263.1491 | -2.85    | $3.04 \times 10^{-3}$ | 1.26                  |       |
| 9.1149  | 211.2071 | -2.88    | $3.86 \times 10^{-3}$ | 1.25                  |       |
| 8.6108  | 540.3681 | -2.95    | $3.86 \times 10^{-4}$ | 2.35                  |       |
| 9.1160  | 409.2196 | -3.02    | $9.27 \times 10^{-4}$ | 1.94                  |       |
| 0.9264  | 164.9270 | -3.40    | $9.46 \times 10^{-4}$ | 2.73                  |       |
| 8.8368  | 453.3377 | -3.69    | $1.45 \times 10^{-2}$ | 1.36                  |       |
| 0.9373  | 257.0793 | -3.75    | $5.86 \times 10^{-3}$ | 1.32                  |       |
| 9.1252  | 211.1975 | -3.79    | $2.83 \times 10^{-4}$ | 1.01                  |       |
| 5.1459  | 368.0939 | -4.33    | $5.87 \times 10^{-3}$ | 1.13                  |       |
| 8.8351  | 471.3495 | -4.64    | $3.95 \times 10^{-4}$ | 2.03                  |       |
| ESI-    | 10.4872  | 272.4697 | 2.84                  | $9.75 \times 10^{-3}$ | 1.35  |
|         | 12.8538  | 590.3670 | 2.74                  | $7.72 \times 10^{-4}$ | 4.04  |
|         | 0.8164   | 624.5393 | 2.69                  | $8.64 \times 10^{-5}$ | 1.10  |
|         | 12.8456  | 421.1370 | 2.68                  | $2.93 \times 10^{-3}$ | 1.61  |
|         | 13.3077  | 367.1600 | 2.41                  | $4.76 \times 10^{-4}$ | 2.12  |
|         | 12.8456  | 351.1482 | 2.33                  | $7.82 \times 10^{-3}$ | 3.03  |
|         | 12.8497  | 253.2179 | 2.31                  | $3.76 \times 10^{-3}$ | 3.25  |
|         | 10.7446  | 999.6508 | 2.27                  | $9.27 \times 10^{-3}$ | 1.33  |
|         | 12.8998  | 640.3839 | 2.25                  | $2.84 \times 10^{-2}$ | 1.25  |
|         | 12.8583  | 353.1399 | 2.19                  | $4.86 \times 10^{-4}$ | 12.74 |
|         | 10.4734  | 122.8181 | 2.16                  | $8.36 \times 10^{-3}$ | 1.21  |
|         | 9.6211   | 518.2512 | 2.14                  | $9.90 \times 10^{-3}$ | 1.61  |
|         | 12.721   | 655.4700 | 2.14                  | $8.26 \times 10^{-3}$ | 1.20  |

---

|         |          |      |                       |      |
|---------|----------|------|-----------------------|------|
| 9.1904  | 213.1490 | 2.11 | $3.75 \times 10^{-2}$ | 3.26 |
| 9.5596  | 858.2711 | 2.10 | $2.31 \times 10^{-2}$ | 1.28 |
| 13.7647 | 135.9694 | 2.09 | $4.76 \times 10^{-3}$ | 7.03 |
| 13.3038 | 405.1742 | 2.06 | $9.26 \times 10^{-4}$ | 2.76 |
| 13.2454 | 299.2594 | 2.03 | $5.99 \times 10^{-4}$ | 3.99 |
| 14.8149 | 265.1477 | 2.01 | $3.56 \times 10^{-4}$ | 4.97 |
| 9.6961  | 810.2704 | 1.99 | $8.62 \times 10^{-3}$ | 2.12 |
| 10.9652 | 621.3061 | 1.96 | $7.50 \times 10^{-3}$ | 1.74 |
| 12.6673 | 327.1259 | 1.93 | $2.56 \times 10^{-3}$ | 3.34 |
| 1.0011  | 528.7949 | 1.93 | $4.76 \times 10^{-4}$ | 1.05 |
| 9.6171  | 450.2621 | 1.91 | $1.83 \times 10^{-3}$ | 3.57 |
| 12.8485 | 321.1982 | 1.91 | $9.36 \times 10^{-4}$ | 1.10 |
| 12.5163 | 377.1417 | 1.87 | $9.25 \times 10^{-5}$ | 2.44 |
| 10.0493 | 166.2735 | 1.87 | $2.65 \times 10^{-4}$ | 1.14 |
| 9.6113  | 522.2631 | 1.87 | $2.66 \times 10^{-3}$ | 1.37 |
| 12.9998 | 329.2524 | 1.84 | $1.13 \times 10^{-2}$ | 1.59 |
| 12.8462 | 321.2062 | 1.84 | $3.04 \times 10^{-3}$ | 1.25 |
| 6.9397  | 155.7055 | 1.81 | $4.56 \times 10^{-4}$ | 1.96 |
| 9.1914  | 281.1380 | 1.81 | $2.84 \times 10^{-2}$ | 2.07 |
| 9.3736  | 452.2799 | 1.80 | $1.93 \times 10^{-3}$ | 1.60 |
| 13.7569 | 366.2269 | 1.79 | $5.78 \times 10^{-3}$ | 1.00 |
| 10.4744 | 68.2375  | 1.79 | $3.96 \times 10^{-4}$ | 1.38 |
| 12.1801 | 100.9319 | 1.79 | $3.97 \times 10^{-4}$ | 2.49 |
| 12.1771 | 271.2276 | 1.79 | $9.74 \times 10^{-5}$ | 1.77 |
| 10.4746 | 123.0601 | 1.75 | $2.89 \times 10^{-2}$ | 1.16 |
| 13.7592 | 349.2383 | 1.74 | $9.67 \times 10^{-5}$ | 1.09 |
| 11.1301 | 297.2418 | 1.72 | $8.67 \times 10^{-4}$ | 2.46 |
| 0.7545  | 962.8179 | 1.71 | $6.97 \times 10^{-3}$ | 1.47 |
| 11.7745 | 77.2288  | 1.69 | $5.59 \times 10^{-3}$ | 1.07 |
| 13.0128 | 429.1731 | 1.68 | $7.76 \times 10^{-3}$ | 2.45 |
| 9.5449  | 671.2936 | 1.67 | $3.86 \times 10^{-2}$ | 1.26 |
| 10.8127 | 57.1329  | 1.65 | $3.65 \times 10^{-2}$ | 1.12 |
| 13.9327 | 407.1875 | 1.63 | $9.57 \times 10^{-5}$ | 1.05 |
| 12.7183 | 425.1618 | 1.63 | $3.65 \times 10^{-4}$ | 1.26 |
| 14.1607 | 201.8243 | 1.61 | $7.72 \times 10^{-3}$ | 1.37 |
| 14.8331 | 409.2066 | 1.61 | $5.66 \times 10^{-3}$ | 1.43 |
| 10.9290 | 616.3714 | 1.60 | $5.76 \times 10^{-4}$ | 1.48 |
| 13.7590 | 134.8924 | 1.60 | $7.53 \times 10^{-4}$ | 4.39 |
| 9.4981  | 538.3145 | 1.59 | $9.27 \times 10^{-3}$ | 6.23 |
| 13.0800 | 293.1755 | 1.58 | $3.92 \times 10^{-2}$ | 1.58 |
| 12.8356 | 655.4235 | 1.57 | $7.75 \times 10^{-3}$ | 4.56 |
| 13.7588 | 646.4296 | 1.57 | $3.75 \times 10^{-4}$ | 3.53 |
| 11.0153 | 325.2073 | 1.56 | $6.45 \times 10^{-4}$ | 1.20 |
| 12.7146 | 395.2211 | 1.56 | $9.34 \times 10^{-4}$ | 2.49 |
| 10.2988 | 590.3462 | 1.54 | $7.29 \times 10^{-3}$ | 6.83 |

---

---

|         |          |       |                       |       |
|---------|----------|-------|-----------------------|-------|
| 9.6275  | 610.3177 | 1.54  | $2.85 \times 10^{-2}$ | 1.58  |
| 9.6970  | 623.2960 | 1.52  | $1.94 \times 10^{-2}$ | 1.83  |
| 12.7028 | 427.1574 | 1.52  | $6.50 \times 10^{-4}$ | 5.11  |
| 13.7629 | 466.1524 | 1.51  | $9.35 \times 10^{-5}$ | 1.32  |
| 9.5498  | 790.2813 | 1.51  | $4.65 \times 10^{-4}$ | 1.49  |
| 5.3151  | 257.1007 | 1.50  | $7.64 \times 10^{-3}$ | 1.10  |
| 7.9429  | 335.0591 | -1.50 | $3.75 \times 10^{-3}$ | 2.69  |
| 4.9430  | 276.0770 | -1.50 | $2.96 \times 10^{-3}$ | 1.00  |
| 1.1223  | 175.0235 | -1.51 | $8.67 \times 10^{-4}$ | 4.48  |
| 1.1079  | 133.0140 | -1.51 | $9.47 \times 10^{-4}$ | 3.65  |
| 8.2303  | 344.1535 | -1.51 | $3.75 \times 10^{-4}$ | 2.27  |
| 5.3666  | 128.0348 | -1.51 | $6.75 \times 10^{-3}$ | 2.27  |
| 6.7888  | 186.1111 | -1.53 | $5.63 \times 10^{-3}$ | 1.75  |
| 4.8856  | 144.0638 | -1.54 | $6.73 \times 10^{-3}$ | 1.51  |
| 0.8701  | 301.8977 | -1.55 | $9.78 \times 10^{-4}$ | 1.64  |
| 5.5167  | 190.0518 | -1.55 | $3.64 \times 10^{-2}$ | 2.00  |
| 1.5234  | 117.0186 | -1.58 | $5.74 \times 10^{-3}$ | 5.03  |
| 5.7436  | 415.9659 | -1.58 | $4.93 \times 10^{-3}$ | 1.43  |
| 5.7463  | 483.9565 | -1.59 | $5.86 \times 10^{-4}$ | 1.30  |
| 6.9987  | 201.1133 | -1.60 | $3.85 \times 10^{-3}$ | 2.45  |
| 5.8259  | 370.0702 | -1.61 | $7.36 \times 10^{-3}$ | 1.01  |
| 7.2624  | 202.0502 | -1.61 | $5.76 \times 10^{-3}$ | 2.17  |
| 6.4011  | 270.0397 | -1.62 | $9.57 \times 10^{-5}$ | 1.62  |
| 4.9520  | 277.0878 | -1.63 | $3.65 \times 10^{-3}$ | 1.01  |
| 6.9953  | 223.0959 | -1.63 | $8.25 \times 10^{-3}$ | 1.49  |
| 11.5081 | 366.1130 | -1.64 | $4.76 \times 10^{-3}$ | 1.56  |
| 5.6907  | 266.9938 | -1.67 | $7.66 \times 10^{-4}$ | 1.92  |
| 5.6969  | 332.1225 | -1.70 | $3.28 \times 10^{-2}$ | 1.15  |
| 0.9289  | 247.9740 | -1.70 | $3.75 \times 10^{-3}$ | 1.20  |
| 0.8554  | 166.8485 | -1.71 | $8.56 \times 10^{-4}$ | 1.38  |
| 6.0720  | 349.1485 | -1.71 | $5.73 \times 10^{-5}$ | 1.26  |
| 1.5029  | 229.0306 | -1.74 | $4.76 \times 10^{-4}$ | 3.39  |
| 1.1564  | 285.0612 | -1.75 | $9.27 \times 10^{-3}$ | 1.19  |
| 5.5186  | 172.9895 | -1.75 | $3.85 \times 10^{-4}$ | 12.05 |
| 5.5164  | 257.9690 | -1.76 | $2.85 \times 10^{-4}$ | 2.58  |
| 5.6942  | 245.0108 | -1.76 | $9.47 \times 10^{-3}$ | 3.45  |
| 6.3325  | 239.0905 | -1.76 | $3.75 \times 10^{-2}$ | 1.67  |
| 6.2017  | 217.1071 | -1.77 | $3.82 \times 10^{-4}$ | 1.79  |
| 5.5168  | 240.9799 | -1.79 | $8.70 \times 10^{-4}$ | 2.62  |
| 10.3612 | 253.1799 | -1.81 | $4.87 \times 10^{-3}$ | 3.78  |
| 1.5198  | 236.9687 | -1.85 | $8.63 \times 10^{-3}$ | 1.83  |
| 7.2685  | 270.0390 | -1.86 | $5.98 \times 10^{-4}$ | 1.34  |
| 6.7945  | 349.0008 | -1.87 | $3.84 \times 10^{-5}$ | 1.99  |
| 7.9353  | 330.1388 | -1.88 | $8.67 \times 10^{-3}$ | 1.19  |
| 5.8297  | 348.0841 | -1.89 | $3.93 \times 10^{-4}$ | 1.92  |

---

---

|         |          |       |                       |      |
|---------|----------|-------|-----------------------|------|
| 1.5062  | 251.0134 | -1.89 | $5.98 \times 10^{-4}$ | 2.71 |
| 5.8977  | 290.0141 | -1.90 | $2.08 \times 10^{-3}$ | 2.54 |
| 5.6870  | 334.9836 | -1.92 | $3.86 \times 10^{-4}$ | 1.13 |
| 9.9938  | 279.2306 | -1.92 | $4.38 \times 10^{-3}$ | 2.02 |
| 10.3692 | 321.1693 | -1.92 | $3.86 \times 10^{-2}$ | 1.51 |
| 5.9021  | 307.0038 | -1.92 | $3.92 \times 10^{-2}$ | 1.50 |
| 6.3240  | 171.0993 | -1.93 | $7.04 \times 10^{-3}$ | 1.11 |
| 0.8802  | 233.0758 | -1.93 | $8.69 \times 10^{-4}$ | 1.23 |
| 5.8966  | 222.0261 | -1.98 | $3.07 \times 10^{-3}$ | 3.50 |
| 8.3415  | 185.1168 | -1.99 | $3.86 \times 10^{-3}$ | 3.43 |
| 5.3080  | 261.0095 | -2.01 | $5.67 \times 10^{-3}$ | 1.85 |
| 5.9032  | 92.9851  | -2.06 | $8.67 \times 10^{-3}$ | 1.47 |
| 6.3623  | 363.0186 | -2.08 | $9.64 \times 10^{-4}$ | 1.27 |
| 5.9452  | 307.0110 | -2.09 | $3.86 \times 10^{-2}$ | 1.46 |
| 1.4926  | 363.0281 | -2.10 | $5.90 \times 10^{-3}$ | 2.09 |
| 4.9512  | 309.1102 | -2.12 | $4.76 \times 10^{-4}$ | 1.98 |
| 8.5226  | 439.1946 | -2.13 | $3.82 \times 10^{-4}$ | 2.54 |
| 7.9082  | 343.1745 | -2.20 | $6.08 \times 10^{-3}$ | 1.51 |
| 8.5226  | 371.2061 | -2.21 | $4.97 \times 10^{-3}$ | 5.16 |
| 7.0010  | 253.0512 | -2.22 | $8.97 \times 10^{-4}$ | 1.45 |
| 5.0617  | 331.0924 | -2.23 | $6.85 \times 10^{-4}$ | 1.85 |
| 4.9479  | 331.0908 | -2.25 | $3.66 \times 10^{-3}$ | 1.26 |
| 6.2000  | 179.0345 | -2.29 | $8.79 \times 10^{-4}$ | 1.87 |
| 7.1130  | 257.1759 | -2.34 | $6.53 \times 10^{-4}$ | 2.15 |
| 5.8845  | 290.0220 | -2.35 | $1.94 \times 10^{-2}$ | 2.83 |
| 5.6461  | 273.0088 | -2.35 | $6.87 \times 10^{-3}$ | 1.70 |
| 5.6416  | 203.0008 | -2.35 | $3.84 \times 10^{-4}$ | 1.49 |
| 9.9464  | 253.1786 | -2.37 | $2.96 \times 10^{-3}$ | 1.28 |
| 9.2170  | 589.1862 | -2.42 | $5.97 \times 10^{-4}$ | 1.84 |
| 8.3433  | 253.1325 | -2.42 | $3.89 \times 10^{-3}$ | 1.34 |
| 5.6162  | 269.0680 | -2.44 | $8.67 \times 10^{-4}$ | 2.36 |
| 9.2177  | 470.2008 | -2.47 | $1.98 \times 10^{-3}$ | 1.40 |
| 7.9566  | 226.1453 | -2.48 | $4.79 \times 10^{-4}$ | 2.08 |
| 8.5246  | 456.1821 | -2.50 | $5.57 \times 10^{-4}$ | 1.17 |
| 7.9721  | 556.3265 | -2.50 | $3.85 \times 10^{-4}$ | 5.26 |
| 8.5224  | 507.1806 | -2.62 | $6.06 \times 10^{-5}$ | 1.63 |
| 9.2142  | 385.2214 | -2.62 | $2.74 \times 10^{-3}$ | 8.55 |
| 7.9609  | 294.1313 | -2.65 | $7.59 \times 10^{-3}$ | 1.12 |
| 9.2152  | 453.2106 | -2.68 | $4.76 \times 10^{-2}$ | 4.45 |
| 5.4352  | 188.0357 | -2.74 | $5.96 \times 10^{-3}$ | 1.07 |
| 5.9034  | 425.9876 | -2.75 | $5.32 \times 10^{-3}$ | 1.04 |
| 6.1924  | 247.0220 | -2.75 | $5.87 \times 10^{-4}$ | 1.27 |
| 6.5994  | 337.0364 | -2.81 | $5.84 \times 10^{-3}$ | 1.52 |
| 7.9704  | 624.3160 | -2.86 | $3.86 \times 10^{-3}$ | 2.21 |
| 7.9482  | 226.1383 | -2.90 | $4.87 \times 10^{-4}$ | 2.09 |

---

|        |          |       |                       |      |
|--------|----------|-------|-----------------------|------|
| 9.2177 | 521.1983 | -2.90 | $6.57 \times 10^{-3}$ | 2.52 |
| 9.6894 | 354.1750 | -3.00 | $9.47 \times 10^{-3}$ | 1.01 |
| 5.5826 | 408.0888 | -3.54 | $5.86 \times 10^{-3}$ | 1.56 |
| 7.9738 | 692.2986 | -3.58 | $3.86 \times 10^{-2}$ | 1.24 |
| 0.8226 | 806.4070 | -5.11 | $9.78 \times 10^{-4}$ | 1.61 |

a) Fold change was calculated from the arithmetic mean values of the Tph2<sup>-/-</sup> mice and the control mice. Fold change with a positive value indicates a relatively higher concentration in the Tph2<sup>-/-</sup> mice, while a negative value indicates a relatively lower concentration compared with the control mice.

b) *P*-values were determined by the Mann-Whitney *U* test.

c) VIP denotes variable importance for projection where values larger than 1.00 reflects high contribution to the distinction between the Tph2<sup>-/-</sup> group and the control group.

**Supplementary Table S5** Summary of the Metabolic Pathway Analysis (MetPA) results in Tph2<sup>-/-</sup> mice

| No. | Pathway Name                                        | Hits <sup>a</sup> | <i>p</i> <sup>b</sup> | -log( <i>p</i> ) | Impact <sup>c</sup> |
|-----|-----------------------------------------------------|-------------------|-----------------------|------------------|---------------------|
| 1   | Phenylalanine, tyrosine and tryptophan biosynthesis | 2                 | 6.203E-4              | 7.3853           | 1.0                 |
| 2   | Phenylalanine metabolism                            | 2                 | 0.005447              | 5.2127           | 0.40741             |
| 3   | Citrate cycle (TCA cycle)                           | 3                 | 9.833E-4              | 6.9246           | 0.15106             |
| 4   | Purine metabolism                                   | 4                 | 0.0044376             | 5.4176           | 0.03436             |
| 5   | Tryptophan metabolism                               | 2                 | 0.064714              | 2.7378           | 0.10987             |
| 6   | Butanoate metabolism                                | 2                 | 0.021388              | 3.8449           | 0.0                 |
| 7   | Alanine, aspartate and glutamate metabolism         | 2                 | 0.025244              | 3.6792           | 0.0                 |
| 8   | Ubiquinone and other terpenoid-quinone biosynthesis | 1                 | 0.031444              | 3.4595           | 0.0                 |
| 9   | Glycine, serine and threonine metabolism            | 2                 | 0.040752              | 3.2003           | 0.0                 |
| 10  | Glyoxylate and dicarboxylate metabolism             | 1                 | 0.17529               | 1.7413           | 0.25806             |
| 11  | Pyruvate metabolism                                 | 1                 | 0.21863               | 1.5204           | 0.18375             |
| 12  | Tyrosine metabolism                                 | 1                 | 0.37846               | 0.97166          | 0.14045             |
| 13  | Glycolysis or Gluconeogenesis                       | 1                 | 0.2436                | 1.4122           | 0.09891             |
| 14  | Cysteine and methionine metabolism                  | 1                 | 0.25175               | 1.3793           | 0.02292             |
| 15  | Arginine and proline metabolism                     | 1                 | 0.37846               | 0.97166          | 0.01198             |
| 16  | Valine, leucine and isoleucine biosynthesis         | 1                 | 0.11084               | 2.1996           | 0.0                 |
| 17  | Aminoacyl-tRNA biosynthesis                         | 2                 | 0.16334               | 1.8119           | 0.0                 |
| 18  | Propanoate metabolism                               | 1                 | 0.19289               | 1.6457           | 0.0                 |

a) The 'Hits' is the number of matched compound from the uploaded data in the pathway.

b) The '*p*' is the original *p* value calculated from the pathway enrichment analysis.

c) The 'Impact' is the pathway impact value calculated from the pathway topological analysis.

**Supplementary Table S6** Perturbed metabolic pathways and associated metabolites in Tph2<sup>-/-</sup> mice

| Pathway category      | Pathway <sup>a</sup>                                | Associated metabolites <sup>b</sup>                                       |
|-----------------------|-----------------------------------------------------|---------------------------------------------------------------------------|
| Amino acid metabolism | Phenylalanine, tyrosine and tryptophan biosynthesis | Phenylalanine↑, Tyrosine↓                                                 |
|                       | Phenylalanine metabolism                            | Phenylalanine↑, Tyrosine↓, Hippurate↑                                     |
|                       | Tryptophan metabolism                               | 5-Hydroxyindoleacetate↓, Kynurenine↑, 3-Hydroxykynurenine↑, Xanthurenate↑ |
| Energy metabolism     | Citrate cycle                                       | Citrate↓, Succinate↓, Pyruvate↓                                           |
|                       | -                                                   | Creatine↓                                                                 |
| Nucleotide metabolism | Purine metabolism                                   | Xanthosine↓, Uric acid↓, Guanosine↑, Hypoxanthine↑                        |
| Lipid metabolism      | -                                                   | LysoPC (20:4)↑, LysoPC (22:4)↑                                            |

a) The column 'Pathway' refers to the KEGG database-based pathway correlation results by MetPA.

b) '↑' indicates increased metabolite level of the Tph2<sup>-/-</sup> mice, while '↓' indicates decreased metabolite level compared with the control mice.

**Supplementary Table S7** Summary of the Metabolic Pathway Analysis (MetPA) results of serotonin deficiency

| No. | Pathway Name                                        | Hits <sup>a</sup> | $p^b$     | $-\log(p)$ | Impact <sup>c</sup> |
|-----|-----------------------------------------------------|-------------------|-----------|------------|---------------------|
| 1   | Phenylalanine, tyrosine and tryptophan biosynthesis | 2                 | 0.0011171 | 6.797      | 1.0                 |
| 2   | Phenylalanine metabolism                            | 2                 | 0.0096493 | 4.6409     | 0.40741             |
| 3   | Citrate cycle (TCA cycle)                           | 4                 | 1.2129E-4 | 9.0173     | 0.21905             |
| 4   | Tryptophan metabolism                               | 3                 | 0.017032  | 4.0727     | 0.19371             |
| 5   | Purine metabolism                                   | 5                 | 0.001941  | 6.2446     | 0.06726             |
| 6   | Alanine, aspartate and glutamate metabolism         | 3                 | 0.0040319 | 5.5135     | 0.06329             |
| 7   | Butanoate metabolism                                | 3                 | 0.0031238 | 5.7687     | 0.0                 |
| 8   | Glyoxylate and dicarboxylate metabolism             | 1                 | 0.22696   | 1.483      | 0.25806             |
| 9   | Pyruvate metabolism                                 | 1                 | 0.28074   | 1.2703     | 0.18375             |
| 10  | Tyrosine metabolism                                 | 1                 | 0.47018   | 0.75464    | 0.14045             |
| 11  | Glycolysis or Gluconeogenesis                       | 1                 | 0.31127   | 1.1671     | 0.09891             |
| 12  | Ubiquinone and other terpenoid-quinone biosynthesis | 1                 | 0.041777  | 3.1754     | 0.0                 |
| 13  | Glycine, serine and threonine metabolism            | 2                 | 0.06893   | 2.6747     | 0.0                 |
| 14  | Valine, leucine and isoleucine biosynthesis         | 1                 | 0.14523   | 1.9294     | 0.0                 |
| 15  | Aminoacyl-tRNA biosynthesis                         | 2                 | 0.25411   | 1.37       | 0.0                 |
| 16  | Cysteine and methionine metabolism                  | 1                 | 0.32118   | 1.1358     | 0.02292             |
| 17  | Arginine and proline metabolism                     | 1                 | 0.47018   | 0.75464    | 0.01198             |

a) The 'Hits' is the number of matched compound from the uploaded data in the pathway.

b) The ' $p$ ' is the original  $p$  value calculated from the pathway enrichment analysis.

c) The 'Impact' is the pathway impact value calculated from the pathway topological analysis.



**Supplementary Table S8** Perturbed metabolic pathways and associated metabolites of serotonin deficiency

| Pathway category          | Pathway <sup>a</sup>                                | Associated metabolites <sup>b</sup>                                                                |
|---------------------------|-----------------------------------------------------|----------------------------------------------------------------------------------------------------|
| Amino acid metabolism     | Phenylalanine, tyrosine and tryptophan biosynthesis | Phenylalanine↑, Tyrosine↓                                                                          |
|                           | Phenylalanine metabolism                            | Phenylalanine↑, Hippurate↑, Tyrosine↓                                                              |
|                           | Tryptophan metabolism                               | Serotonin↓, 5-Hydroxyindoleacetate↓, Kynurenine↑, Kynurenate↑, 3-Hydroxykynurenine↑, Xanthurenate↑ |
| Energy metabolism         | Citrate cycle                                       | Citrate↓, Oxoglutarate↓, Succinate↓, Pyruvate↓                                                     |
|                           | -                                                   | Creatinine↓, Creatine↓                                                                             |
| Nucleotide metabolism     | Purine metabolism                                   | Xanthine↓, Xanthosine↓, Uric acid↓, Guanosine↑, Hypoxanthine↑                                      |
| Lipid metabolism          | -                                                   | LysoPC (18:4)↑, LysoPC (20:4)↑, LysoPC (22:4)↑, LysoPC (22:6)↑                                     |
| Gut microflora metabolism | -                                                   | Hippurate↑, 3-Indolepropionic acid↓, Indoxyl sulfate↓                                              |

a) The column 'Pathway' refers to the KEGG database-based pathway correlation results by MetPA.

b) '↑' indicates increased metabolite level of the serotonin deficient mice, while '↓' indicates decreased metabolite level compared with the control mice.

**Supplementary Table S9** The stability and repeatability of the UPLC-MS method validation in the positive (ESI+) and negative (ESI-) ion mode

Stability of the UPLC-MS method

| ESI+ |                    |            |          |            | ESI- |                    |            |          |            |
|------|--------------------|------------|----------|------------|------|--------------------|------------|----------|------------|
| No.  | Retention time/min | RSD% (n=9) | m/z      | RSD% (n=9) | No.  | Retention time/min | RSD% (n=9) | m/z      | RSD% (n=9) |
| 1    | 0.9628             | 0.32       | 657.1317 | 0.00025    | 1    | 1.1629             | 0.44       | 391.1207 | 0.00027    |
| 2    | 5.6324             | 0.10       | 154.0418 | 0.00052    | 2    | 3.0126             | 0.22       | 202.9704 | 0.00028    |
| 3    | 7.3625             | 0.062      | 324.0547 | 0.00042    | 3    | 6.8484             | 0.11       | 154.4972 | 0.00043    |
| 4    | 10.4732            | 0.082      | 862.5690 | 0.000097   | 4    | 9.0752             | 0.087      | 589.1886 | 0.00021    |
| 5    | 14.4975            | 0.049      | 279.1662 | 0.00037    | 5    | 11.5190            | 0.052      | 616.2779 | 0.00012    |
| 6    | 16.8164            | 0.054      | 369.3521 | 0.00035    | 6    | 15.4900            | 0.043      | 201.1137 | 0.00032    |

Repeatability of the UPLC-MS method

| ESI+ |                    |            |          |            | ESI- |                    |            |          |            |
|------|--------------------|------------|----------|------------|------|--------------------|------------|----------|------------|
| No.  | Retention time/min | RSD% (n=6) | m/z      | RSD% (n=6) | No.  | Retention time/min | RSD% (n=6) | m/z      | RSD% (n=6) |
| 1    | 0.9628             | 0.21       | 657.1317 | 0.00017    | 1    | 1.1629             | 0.28       | 391.1207 | 0.00025    |
| 2    | 5.6324             | 0.072      | 154.0418 | 0.00038    | 2    | 3.0126             | 0.17       | 202.9704 | 0.00054    |
| 3    | 7.3625             | 0.058      | 324.0547 | 0.00030    | 3    | 6.8484             | 0.085      | 154.4972 | 0.00033    |
| 4    | 10.4732            | 0.042      | 862.5690 | 0.00015    | 4    | 9.0752             | 0.081      | 589.1886 | 0.00017    |
| 5    | 14.4975            | 0.033      | 279.1662 | 0.00035    | 5    | 11.5190            | 0.031      | 616.2779 | 0.00020    |
| 6    | 16.8164            | 0.032      | 369.3521 | 0.00040    | 6    | 15.4900            | 0.042      | 201.1137 | 0.00026    |

QC samples were evaluated every 10 serum samples to assess system stability, while repeatability was evaluated by the six replicate QC samples. Six metabolites with different m/z values and polarities were selected for quality control/quality assurance purposes under ESI+ and ESI- modes separately.

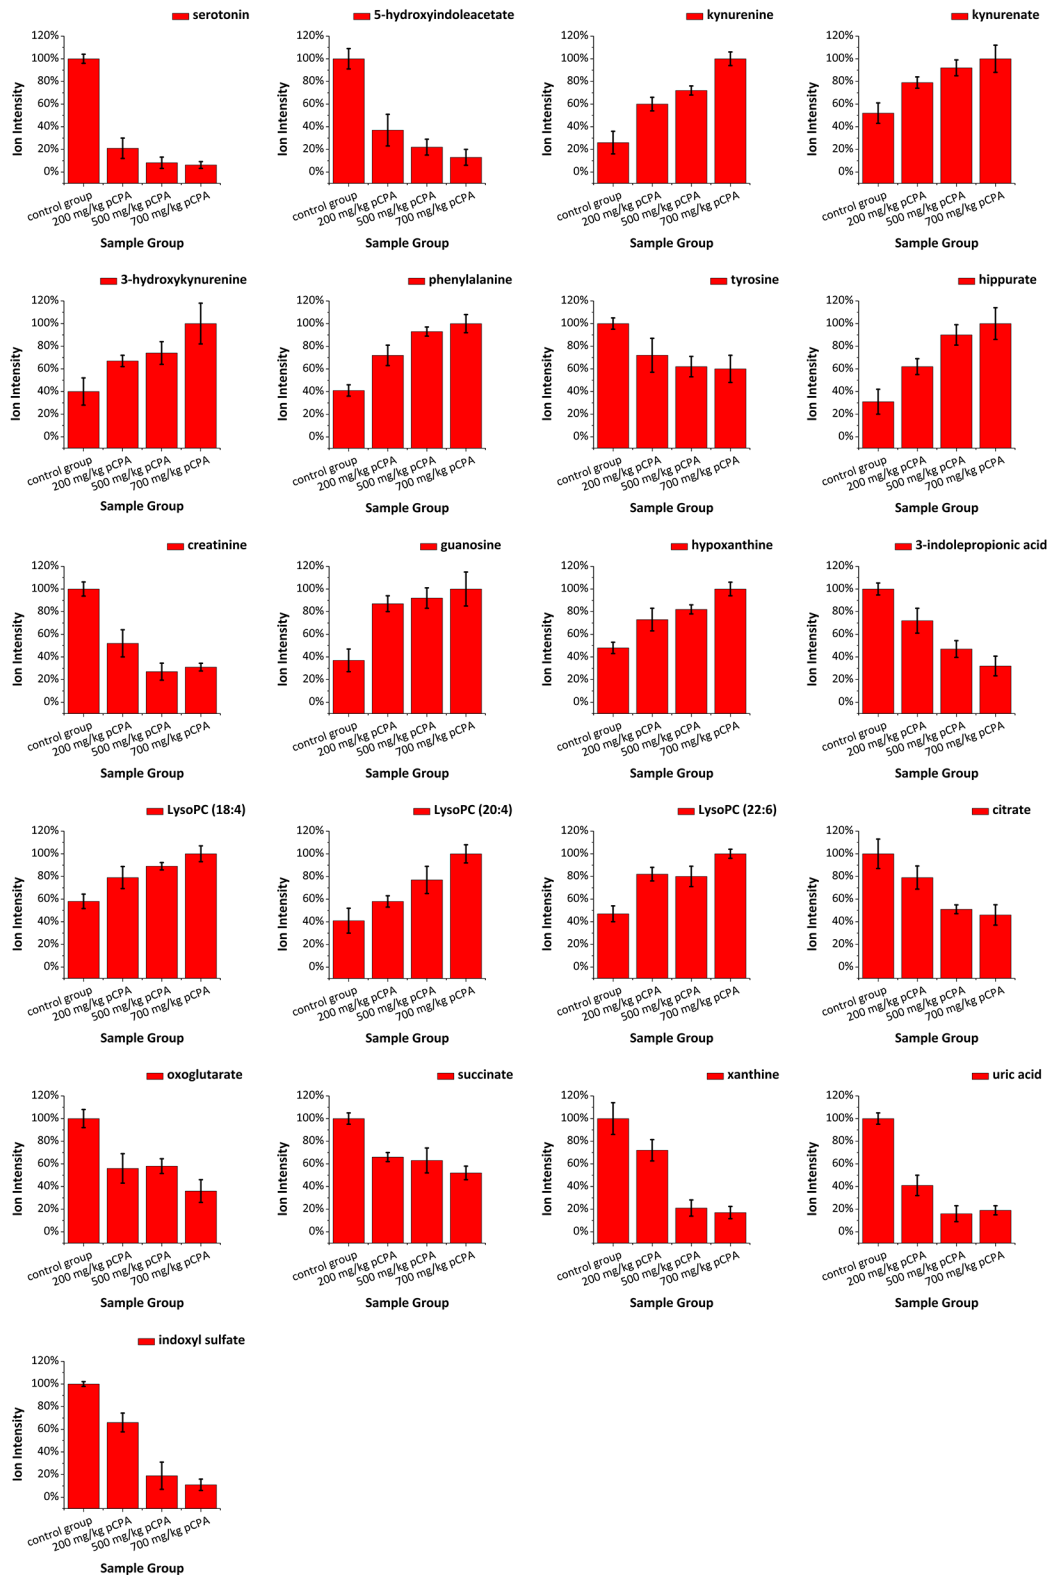

**Supplementary Figure S1** Normalized mean peak areas of metabolites in mice injected with increasing dosages of pCPA compared with the control mice (n=10).

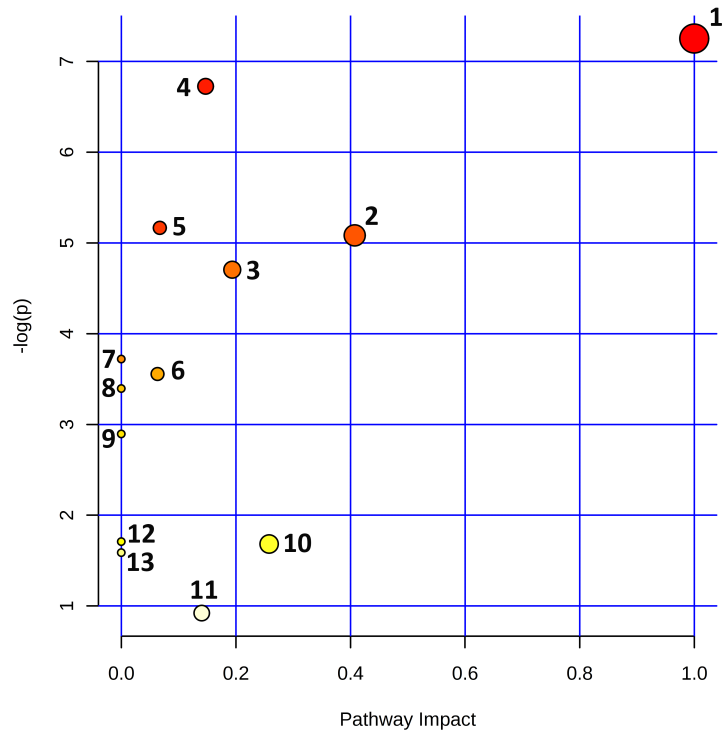

**Supplementary Figure S2** Pathway analysis of the serotonin-deficiency-associated biomarkers induced by pCPA.

The dots mean the serotonin-deficiency-affected pathways, with each number corresponding to the number listed in Supplementary Table S2. Pathways were arranged according to enrichment analysis (y axis) and topology analysis (x axis) scores (see “Materials and methods” section and Supplementary Table S2 for details).

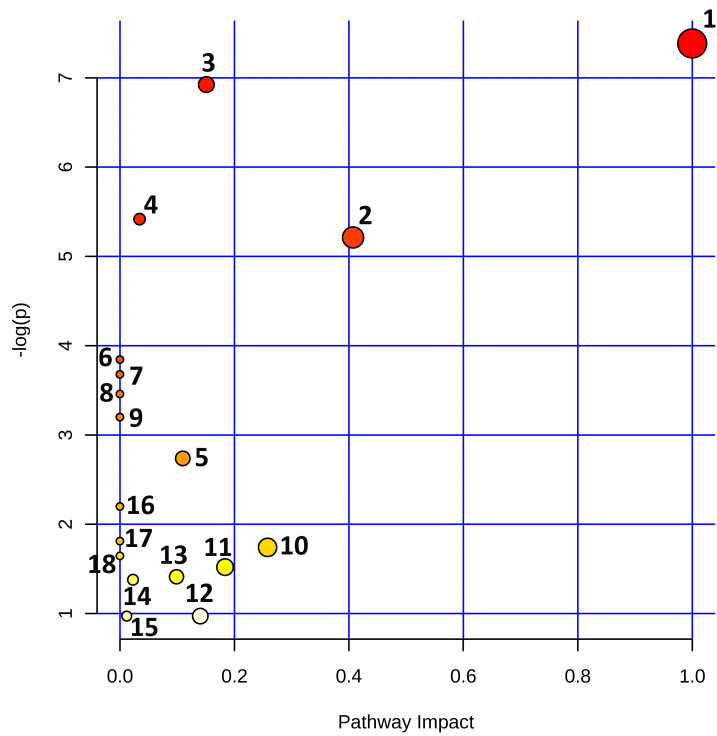

**Supplementary Figure S3** Pathway analysis of the serotonin-deficiency-associated biomarkers in *Tph2*<sup>-/-</sup> mice.

The dots mean the serotonin-deficiency-affected pathways, with each number corresponding to the number listed in Supplementary Table S5. Pathways were arranged according to enrichment analysis (y axis) and topology analysis (x axis) scores (see “Materials and methods” section and Supplementary Table S5 for details).

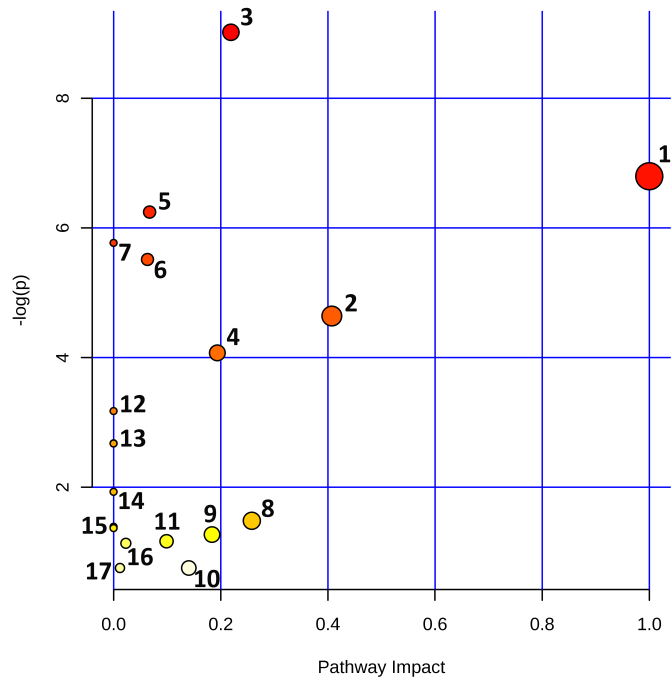

**Supplementary Figure S4** Pathway analysis of the serotonin-deficiency-associated biomarkers using MetPA.

The dots mean the serotonin-deficiency affected pathways, with each number corresponding to the number listed in Supplementary Table S7. Pathways were arranged according to enrichment analysis (y axis) and topology analysis (x axis) scores (see “Materials and methods” section and Supplementary Table S7 for details).
